# Supplementary material for: Equivalent performance of single-use and reusable duodenoscopes in a randomised trial
Source: PubMed Central journal article supplement — Gut. 2020 Sep 7;70(5):838–44. doi: 10.1136/gutjnl-2020-321836 (PMC8040157; doi:10.1136/gutjnl-2020-321836), 2020-09-07
Supplement: gutjnl-2020-321836supp001.pdf [file gutjnl-2020-321836supp001.pdf]

## Duodenoscope Assessment Tool

Date of Service: \_\_\_\_\_

Site #: \_\_\_\_\_

### Demographics

Gender: 1  Male 2  Female

Age: \_\_\_\_\_

### Procedural Indication

#### 1. Biliary

- a.  Suspected/ Proven CBD Stones
- b.  Post-transplant Stricture
- c.  Elevated Liver Tests
- d.  Stent Change
  - Stent Removal
  - Stent Placement
- e.  Cholangitis
- f.  Biliary Stricture:
  - i. Location of stricture: Distal  Mid  Proximal
  - ii. Bismuth Type: 1.  2.  3.  4.  N/A
  - iii. Type of Stricture: Benign  Malignant  Indeterminate
- g.  Other Biliary Indication: \_\_\_\_\_

#### 2. Pancreatic

- a.  Pancreatic Duct Leak
- b.  Pancreatic Duct Stones
- c.  Pancreatic Duct Strictures
- d.  Minor Papilla Interventions
- e.  Stent Change
  - Stent Removal
  - Stent Placement
- f.  Other Pancreatic Interventions: \_\_\_\_\_

### Position

Prone  Supine  Left Lateral 

### Anatomy

Normal Anatomy

Surgically Altered Anatomy  Type: \_\_\_\_\_

### Duodenoscope Information

Manufacturer: \_\_\_\_\_ Model #: \_\_\_\_\_

### Rating Scale for all except for imaging quality/stability, air-water button functionality, hand strain

1. Easy to perform
2. Minimal difficulty to perform
3. Moderate difficulty to perform
4. Severe difficulty to perform
5. Unable to complete the Maneuver

## Duodenoscope Assessment Tool

### Rating Scale for image quality and stability

1. Superior
2. Good
3. Satisfactory
4. Suboptimal
5. Unable to visualize or achieve stability of image resulting in termination of procedure

### Rating Scale for air-water button functionality

1. No water leakage/no difficulty in applying suction or inflating CO<sub>2</sub>
2. Minimal leakage/minimal difficulty in applying suction or inflating CO<sub>2</sub>
3. Moderate leakage/moderate difficulty in applying suction or inflating CO<sub>2</sub>
4. Severe leakage/severe difficulty in applying suction or inflating CO<sub>2</sub>
5. Unable to perform the requisite function

### Rating Scale for hand strain

1. No strain
2. Minimal strain
3. Moderate strain
4. Severe strain
5. Unable to Complete the procedure

### Duodenoscope maneuverability

#### Rating Scale

- |                                              |                             |                             |                             |                             |                             |
|----------------------------------------------|-----------------------------|-----------------------------|-----------------------------|-----------------------------|-----------------------------|
| 1. Intubation of Esophagus:                  | 1. <input type="checkbox"/> | 2. <input type="checkbox"/> | 3. <input type="checkbox"/> | 4. <input type="checkbox"/> | 5. <input type="checkbox"/> |
| 2. Scope Passage into Stomach:               | 1. <input type="checkbox"/> | 2. <input type="checkbox"/> | 3. <input type="checkbox"/> | 4. <input type="checkbox"/> | 5. <input type="checkbox"/> |
| 3. Navigation across pylorus:                | 1. <input type="checkbox"/> | 2. <input type="checkbox"/> | 3. <input type="checkbox"/> | 4. <input type="checkbox"/> | 5. <input type="checkbox"/> |
| 4. Achieving short position (straightening): | 1. <input type="checkbox"/> | 2. <input type="checkbox"/> | 3. <input type="checkbox"/> | 4. <input type="checkbox"/> | 5. <input type="checkbox"/> |
| 5. Achieving optimal papillary position:     | 1. <input type="checkbox"/> | 2. <input type="checkbox"/> | 3. <input type="checkbox"/> | 4. <input type="checkbox"/> | 5. <input type="checkbox"/> |

### Duodenoscope mechanical/imaging characteristics

#### Rating Scale

- |                                                                   |                             |                             |                             |                             |                             |
|-------------------------------------------------------------------|-----------------------------|-----------------------------|-----------------------------|-----------------------------|-----------------------------|
| 1. Scope stiffness:                                               | 1. <input type="checkbox"/> | 2. <input type="checkbox"/> | 3. <input type="checkbox"/> | 4. <input type="checkbox"/> | 5. <input type="checkbox"/> |
| 2. Image Quality:                                                 | 1. <input type="checkbox"/> | 2. <input type="checkbox"/> | 3. <input type="checkbox"/> | 4. <input type="checkbox"/> | 5. <input type="checkbox"/> |
| 3. Image stability:                                               | 1. <input type="checkbox"/> | 2. <input type="checkbox"/> | 3. <input type="checkbox"/> | 4. <input type="checkbox"/> | 5. <input type="checkbox"/> |
| 4. Air-water button functionality:                                | 1. <input type="checkbox"/> | 2. <input type="checkbox"/> | 3. <input type="checkbox"/> | 4. <input type="checkbox"/> | 5. <input type="checkbox"/> |
| 5. Elevator efficiency<br>(Anchor guide wire/accessory exchange): | 1. <input type="checkbox"/> | 2. <input type="checkbox"/> | 3. <input type="checkbox"/> | 4. <input type="checkbox"/> | 5. <input type="checkbox"/> |
| 6. Hand strain:                                                   | 1. <input type="checkbox"/> | 2. <input type="checkbox"/> | 3. <input type="checkbox"/> | 4. <input type="checkbox"/> | 5. <input type="checkbox"/> |

Ability to document images: Yes  No

### Procedure time

1. Time from mouth to papilla (sec): \_\_\_\_\_
2. Time to cannulation after positioning the scope at the papilla (sec): \_\_\_\_\_
3. Total procedure time from scope insertion to procedure completion (min): \_\_\_\_\_

### Ease of Cannulation

1. Number of attempts to cannulate the desired duct: \_\_\_\_\_
2. Cannulation achieved: 1.  Yes 2.  No

## Duodenoscope Assessment Tool

### Biliary Procedural steps

1. Sphincterotomy: No  Yes  (If yes) 1. 2. 3. 4. 5.
2. Sphincteroplasty: No  Yes  (If yes) 1. 2. 3. 4. 5.
3. Balloon sweep: No  Yes  (If yes) 1. 2. 3. 4. 5.
4. Basket: No  Yes  (If yes) 1. 2. 3. 4. 5.
5. Mechanical lithotripsy: No  Yes  (If yes) 1. 2. 3. 4. 5.
6. Stone Clearance: No  Yes  (If yes) 1. 2. 3. 4. 5.
7. Stricture dilation-balloon: No  Yes  (If yes) 1. 2. 3. 4. 5.
8. Stricture dilation-catheter: No  Yes  (If yes) 1. 2. 3. 4. 5.
9. Stent insertion: No  Yes  (If yes) 1. 2. 3. 4. 5.
10. Stent removal: No  Yes  (If yes) 1. 2. 3. 4. 5.
11. Cholangioscopy: No  Yes  (If yes) 1. 2. 3. 4. 5.
12. Biopsies: No  Yes  (If yes) 1. 2. 3. 4. 5.
13. Other (specify): No  Yes  (If yes) 1. 2. 3. 4. 5.

---



---



---

### Pancreatic Procedural steps

1. Sphincterotomy: No  Yes  (If yes) 1. 2. 3. 4. 5.
2. Sphincteroplasty: No  Yes  (If yes) 1. 2. 3. 4. 5.
3. Balloon sweep: No  Yes  (If yes) 1. 2. 3. 4. 5.
4. Basket: No  Yes  (If yes) 1. 2. 3. 4. 5.
5. Mechanical lithotripsy: No  Yes  (If yes) 1. 2. 3. 4. 5.
6. Stone Clearance: No  Yes  (If yes) 1. 2. 3. 4. 5.
7. Stricture dilation-balloon: No  Yes  (If yes) 1. 2. 3. 4. 5.
8. Stricture dilation-catheter: No  Yes  (If yes) 1. 2. 3. 4. 5.
9. Stent insertion: No  Yes  (If yes) 1. 2. 3. 4. 5.
10. Stent removal: No  Yes  (If yes) 1. 2. 3. 4. 5.
11. Cholangioscopy: No  Yes  (If yes) 1. 2. 3. 4. 5.
12. Biopsies: No  Yes  (If yes) 1. 2. 3. 4. 5.
13. Other (specify): No  Yes  (If yes) 1. 2. 3. 4. 5.

---



---



---

## Duodenoscope Assessment Tool

### Intra-procedural Adverse Events

Bleeding:      No  Yes       If yes, intervention needed - No  Yes

Perforation:    No  Yes       If yes, intervention needed - No  Yes

Other, specify: \_\_\_\_\_

### Post-procedural Adverse Events

Pain requiring hospitalization:      No       Yes

Pancreatitis:                              No       Yes  (If yes) Mild       Moderate       Severe

Bleeding:                                    No       Yes  (If yes) Mild       Moderate       Severe

Perforation:                                No       Yes  (If yes) Mild       Moderate       Severe

Other, specify: \_\_\_\_\_

If adverse event occurred, hospitalization Required: No  Yes
