# Supplementary material for: Equivalent performance of single-use and reusable duodenoscopes in a randomised trial
Source: PubMed Central journal article supplement — Gut. 2020 Sep 7;70(5):838–44. doi: 10.1136/gutjnl-2020-321836 (PMC8040157; doi:10.1136/gutjnl-2020-321836), 2020-09-07

**Supplementary Figure 1.** Graphical representation of the equal performance between single-use and reusable duodenoscopes.

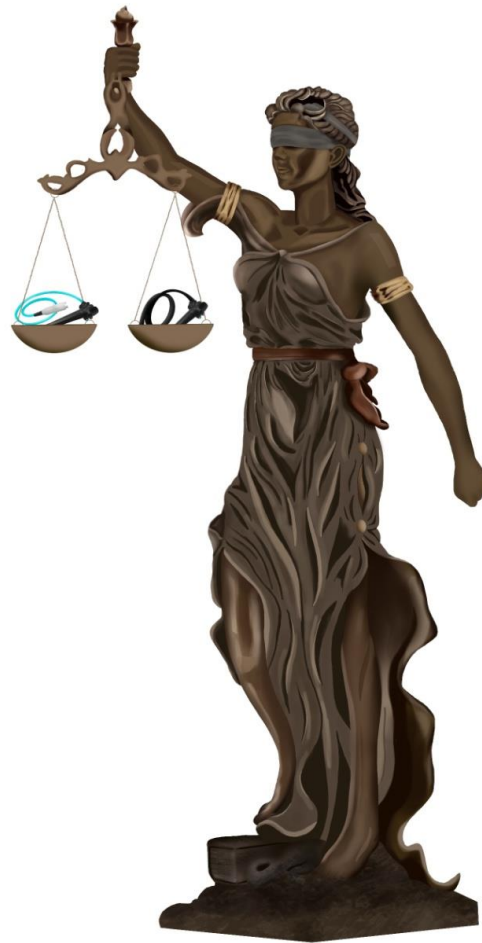

Supplement: gutjnl-2020-321836supp002.pdf [file gutjnl-2020-321836supp002.pdf]
