# Supplementary material for: Equivalent performance of single-use and reusable duodenoscopes in a randomised trial
Source: PubMed Central journal article supplement — Gut. 2020 Sep 7;70(5):838–44. doi: 10.1136/gutjnl-2020-321836 (PMC8040157; doi:10.1136/gutjnl-2020-321836), 2020-09-07
Supplement: gutjnl-2020-321836supp003.pdf [file gutjnl-2020-321836supp003.pdf]

**Supplemental Table 1. Comparison of maneuverability between the duodenoscope types**

|                                               | Rating scale* | Single-use (n=48) | Reusable (n=50) | p-value |           |
|-----------------------------------------------|---------------|-------------------|-----------------|---------|-----------|
| <b>Intubation into esophagus:</b>             | Mean (SD)     | 1.2 (0.6)         | 1.0 (0.2)       | 0.088   |           |
|                                               | n (%)         | 1                 | 42 (87.5)       |         | 48 (96.0) |
|                                               |               | 2                 | 4 (8.3)         |         | 2 (4.0)   |
|                                               |               | 3                 | 1 (2.1)         |         | 0         |
|                                               |               | 4                 | 1 (2.1)         |         | 0         |
|                                               |               | 5                 | 0               |         | 0         |
| <b>Passage into stomach:</b>                  | Mean (SD)     | 1.2 (0.6)         | 1.0 (0.1)       | 0.047   |           |
|                                               | n (%)         | 1                 | 42 (87.5)       |         | 49 (98.0) |
|                                               |               | 2                 | 4 (8.3)         |         | 1 (2.0)   |
|                                               |               | 3                 | 1 (2.1)         |         | 0         |
|                                               |               | 4                 | 1 (2.1)         |         | 0         |
|                                               |               | 5                 | 0               |         | 0         |
| <b>Navigation across pylorus:</b>             | Mean (SD)     | 1.1 (0.5)         | 1.0 (0.2)       | 0.259   |           |
|                                               | n (%)         | 1                 | 44 (91.7)       |         | 48 (96.0) |
|                                               |               | 2                 | 3 (6.3)         |         | 2 (4.0)   |
|                                               |               | 3                 | 0               |         | 0         |
|                                               |               | 4                 | 1 (2.1)         |         | 0         |
|                                               |               | 5                 | 0               |         | 0         |
| <b>Achieving short position of the scope:</b> | Mean (SD)     | 1.2 (0.7)         | 1.1 (0.3)       | 0.106   |           |
|                                               | n (%)         | 1                 | 42 (87.5)       |         | 48 (96.0) |
|                                               |               | 2                 | 2 (4.2)         |         | 1 (2.0)   |
|                                               |               | 3                 | 3 (6.3)         |         | 1 (2.0)   |
|                                               |               | 4                 | 1 (2.1)         |         | 0         |
|                                               |               | 5                 | 0               |         | 0         |
| <b>Achieving optimal papillary position:</b>  | Mean (SD)     | 1.3 (0.7)         | 1.1 (0.4)       | 0.255   |           |
|                                               | n (%)         | 1                 | 41 (85.4)       |         | 46 (92.0) |
|                                               |               | 2                 | 3 (6.3)         |         | 2 (4.0)   |
|                                               |               | 3                 | 3 (6.3)         |         | 2 (4.0)   |
|                                               |               | 4                 | 1 (2.1)         |         | 0         |
|                                               |               | 5                 | 0               |         | 0         |

Abbreviations: SD, standard deviation

\* Overall mean scores (SD) for duodenoscope maneuverability are 1.20 (0.50) for single-use duodenoscopes and 1.06 (0.16) for reusable duodenoscopes, p=0.065

**Supplemental Table 2. Comparison of mechanical and imaging characteristics between the duodenoscope types**

|                                        | Rating scale* | Single-use (n=48) | Reusable (n=50) | p-value |           |
|----------------------------------------|---------------|-------------------|-----------------|---------|-----------|
| <b>Scope stiffness:</b>                | Mean (SD)     | 1.4 (0.7)         | 1.1 (0.2)       | 0.005   |           |
|                                        | n (%)         | 1                 | 36 (75.0)       |         | 47 (94.0) |
|                                        |               | 2                 | 7 (14.6)        |         | 3 (6.0)   |
|                                        |               | 3                 | 4 (8.3)         |         | 0         |
|                                        |               | 4                 | 1 (2.1)         |         | 0         |
|                                        |               | 5                 | 0               |         | 0         |
| <b>Image quality:</b>                  | Mean (SD)     | 1.5 (0.9)         | 1.0 (0)         | <0.001  |           |
|                                        | n (%)         | 1                 | 33 (68.8)       |         | 50 (100)  |
|                                        |               | 2                 | 8 (16.7)        |         | 0         |
|                                        |               | 3                 | 5 (10.4)        |         | 0         |
|                                        |               | 4                 | 2 (4.2)         |         | 0         |
|                                        |               | 5                 | 0               |         | 0         |
| <b>Image stability:</b>                | Mean (SD)     | 1.5 (0.9)         | 1.0 (0)         | <0.001  |           |
|                                        | n (%)         | 1                 | 34 (70.8)       |         | 50 (100)  |
|                                        |               | 2                 | 6 (12.5)        |         | 0         |
|                                        |               | 3                 | 6 (12.5)        |         | 0         |
|                                        |               | 4                 | 2 (4.2)         |         | 0         |
|                                        |               | 5                 | 0               |         | 0         |
| <b>Air-water button functionality:</b> | Mean (SD)     | 1.8 (1.2)         | 1.0 (0.1)       | <0.001  |           |
|                                        | n (%)         | 1                 | 30 (62.5)       |         | 49 (98.0) |
|                                        |               | 2                 | 5 (10.4)        |         | 1 (2.0)   |
|                                        |               | 3                 | 5 (10.4)        |         | 0         |
|                                        |               | 4                 | 7 (14.6)        |         | 0         |
|                                        |               | 5                 | 1 (2.1)         |         | 0         |
| <b>Elevator efficiency:</b>            | Mean (SD)     | 1.4 (0.9)         | 1.1 (0.6)       | 0.055   |           |
|                                        | n (%)         | 1                 | 36 (75.0)       |         | 47 (94.0) |
|                                        |               | 2                 | 8 (16.7)        |         | 2 (4.0)   |
|                                        |               | 3                 | 1 (2.1)         |         | 0         |
|                                        |               | 4                 | 2 (4.2)         |         | 0         |
|                                        |               | 5                 | 1 (2.1)         |         | 1 (2.0)   |
| <b>Hand strain:</b>                    | Mean (SD)     | 1.2 (0.5)         | 1.1 (0.3)       | 0.450   |           |
|                                        | n (%)         | 1                 | 42 (87.5)       |         | 44 (88.0) |
|                                        |               | 2                 | 3 (6.3)         |         | 6 (12.0)  |
|                                        |               | 3                 | 3 (6.3)         |         | 0         |
|                                        |               | 4                 | 0               |         | 0         |
|                                        |               | 5                 | 0               |         | 0         |

Abbreviations: SD, standard deviation

\* Overall mean scores (SD) for duodenoscope mechanical and imaging characteristics are 1.47 (0.72) for single-use duodenoscopes and 1.05 (0.14) for reusable duodenoscopes,  $p < 0.001$ .

**Supplemental Table 3. Comparison of the ability to perform biliary interventions between the duodenoscope types\***

|                                           | Rating scale† | Single-use duodenoscope | Reusable duodenoscope | p-value   |           |
|-------------------------------------------|---------------|-------------------------|-----------------------|-----------|-----------|
| <b>Sphincterotomy:</b>                    | Mean (SD)     | 1.1 (0.4)               | 1.1 (0.4)             | 0.968     |           |
|                                           | n (%)         | 1                       | 38 (88.4)             |           | 36 (85.7) |
|                                           |               | 2                       | 4 (9.3)               |           | 6 (14.3)  |
|                                           |               | 3                       | 1 (2.3)               |           | 0         |
|                                           |               | 4                       | 0                     |           | 0         |
|                                           |               | 5                       | 0                     |           | 0         |
| <b>Sphincteroplasty:</b>                  | n (%)         | 1                       | 3 (100)               | 1 (100)   | 0.999     |
|                                           |               | 2                       | 0                     | 0         |           |
|                                           |               | 3                       | 0                     | 0         |           |
|                                           |               | 4                       | 0                     | 0         |           |
|                                           |               | 5                       | 0                     | 0         |           |
|                                           | Mean (SD)     | 1.1 (0.3)               | 1.1 (0.4)             |           |           |
| <b>Balloon sweep:</b>                     | n (%)         | 1                       | 23 (92.0)             | 24 (96.0) | 0.999     |
|                                           |               | 2                       | 2 (8.0)               | 0         |           |
|                                           |               | 3                       | 0                     | 1 (4.0)   |           |
|                                           |               | 4                       | 0                     | 0         |           |
|                                           |               | 5                       | 0                     | 0         |           |
|                                           | Mean (SD)     | 1.1 (0.3)               | 1.1 (0.4)             |           |           |
| <b>Use of basket:</b>                     | n (%)         | 1                       | 0                     | 1 (100)   | 0.157     |
|                                           |               | 2                       | 1 (100)               | 0         |           |
|                                           |               | 3                       | 0                     | 0         |           |
|                                           |               | 4                       | 0                     | 0         |           |
|                                           |               | 5                       | 0                     | 0         |           |
|                                           | Mean (SD)     | 1.1 (0.3)               | 1.2 (0.5)             |           |           |
| <b>Mechanical lithotripsy:</b>            | n (%)         | 1                       | 1 (100)               | 0         | -         |
|                                           |               | 2                       | 0                     | 0         |           |
|                                           |               | 3                       | 0                     | 0         |           |
|                                           |               | 4                       | 0                     | 0         |           |
|                                           |               | 5                       | 0                     | 0         |           |
|                                           | Mean (SD)     | 1.1 (0.3)               | 1.2 (0.5)             |           |           |
| <b>Stone clearance:</b>                   | n (%)         | 1                       | 19 (90.5)             | 19 (86.4) | 0.499     |
|                                           |               | 2                       | 2 (9.5)               | 2 (9.1)   |           |
|                                           |               | 3                       | 0                     | 1 (4.5)   |           |
|                                           |               | 4                       | 0                     | 0         |           |
|                                           |               | 5                       | 0                     | 0         |           |
|                                           | Mean (SD)     | 1.1 (0.3)               | 1.2 (0.5)             |           |           |
| <b>Stricture dilation using balloon:</b>  | n (%)         | 1                       | 3 (100)               | 2 (100)   | 0.999     |
|                                           |               | 2                       | 0                     | 0         |           |
|                                           |               | 3                       | 0                     | 0         |           |
|                                           |               | 4                       | 0                     | 0         |           |
|                                           |               | 5                       | 0                     | 0         |           |
|                                           | Mean (SD)     | 1.1 (0.3)               | 1.2 (0.5)             |           |           |
| <b>Stricture dilation using catheter:</b> | n (%)         | 1                       | 1 (100)               | 0         | -         |
|                                           |               | 2                       | 0                     | 0         |           |
|                                           |               | 3                       | 0                     | 0         |           |
|                                           |               | 4                       | 0                     | 0         |           |
|                                           |               | 5                       | 0                     | 0         |           |
|                                           | Mean (SD)     | 1.1 (0.3)               | 1.2 (0.5)             |           |           |

|                                        |           |           |           |       |
|----------------------------------------|-----------|-----------|-----------|-------|
| <b>Stent insertion:</b>                | Mean (SD) | 1.4 (0.5) | 1.3 (0.7) | 0.793 |
|                                        | n (%)     | 1         | 13 (81.3) |       |
|                                        |           | 2         | 1 (6.3)   |       |
|                                        |           | 3         | 2 (12.5)  |       |
|                                        |           | 4         | 0         |       |
|                                        |           | 5         | 0         |       |
| <b>Single operator cholangioscopy:</b> | n (%)     | 1         | 1 (100)   | 0.999 |
|                                        |           | 2         | 0         |       |
|                                        |           | 3         | 0         |       |
|                                        |           | 4         | 0         |       |
|                                        |           | 5         | 0         |       |
|                                        |           | 5         | 0         |       |
| <b>Biopsies:</b>                       | n (%)     | 1         | 1 (100)   | 0.999 |
|                                        |           | 2         | 0         |       |
|                                        |           | 3         | 0         |       |
|                                        |           | 4         | 0         |       |
|                                        |           | 5         | 0         |       |
|                                        |           | 5         | 0         |       |

Abbreviations: SD, standard deviation

\* Overall mean scores (SD) for the ability to perform interventions are 1.14 (0.31) for single-use duodenoscopes and 1.20 (0.40) for reusable duodenoscopes,  $p=0.427$ .

† Given the small number of subjects and absence of variation in the data, mean scores (SD) were not calculated for the following items: Sphincteroplasty, use of basket, mechanical lithotripsy, stricture dilation using balloon/catheter, single operator cholangioscopy, biopsies.

**Supplemental Table 4. Comparison of the ability to perform pancreatic/other interventions between the duodenoscope types**

|                                           | Rating scale* | Pancreatic/other interventions |                       |           |       |
|-------------------------------------------|---------------|--------------------------------|-----------------------|-----------|-------|
|                                           |               | Single-use duodenoscope        | Reusable duodenoscope | p-value   |       |
| <b>Sphincterotomy:</b>                    | n (%)         | 1                              | 2 (100)               | 6 (100)   | 0.999 |
|                                           |               | 2                              | 0                     | 0         |       |
|                                           |               | 3                              | 0                     | 0         |       |
|                                           |               | 4                              | 0                     | 0         |       |
|                                           |               | 5                              | 0                     | 0         |       |
| <b>Stricture dilation using balloon:</b>  | n (%)         | 1                              | 0                     | 1 (50)    | -     |
|                                           |               | 2                              | 0                     | 0         |       |
|                                           |               | 3                              | 0                     | 1 (50)    |       |
|                                           |               | 4                              | 0                     | 0         |       |
|                                           |               | 5                              | 0                     | 0         |       |
| <b>Stricture dilation using catheter:</b> | n (%)         | 1                              | 0                     | 0         | -     |
|                                           |               | 2                              | 0                     | 0         |       |
|                                           |               | 3                              | 0                     | 1 (100)   |       |
|                                           |               | 4                              | 0                     | 0         |       |
|                                           |               | 5                              | 0                     | 0         |       |
| <b>Stent insertion:</b>                   | Mean (SD)     |                                | 1.4 (0.5)             | 1.1 (0.3) | 0.128 |
|                                           | n (%)         | 1                              | 5 (55.6)              | 8 (88.9)  |       |
|                                           |               | 2                              | 4 (44.4)              | 1 (11.1)  |       |
|                                           |               | 3                              | 0                     | 0         |       |
|                                           |               | 4                              | 0                     | 0         |       |
|                                           |               | 5                              | 0                     | 0         |       |
| <b>Single operator pancreatoscopy:</b>    | n (%)         | 1                              | 1 (100)               | 0         | -     |
|                                           |               | 2                              | 0                     | 0         |       |
|                                           |               | 3                              | 0                     | 0         |       |
|                                           |               | 4                              | 0                     | 0         |       |
|                                           |               | 5                              | 0                     | 0         |       |
| <b>Biopsies:</b>                          | n (%)         | 1                              | 1 (100)               | 0         | -     |
|                                           |               | 2                              | 0                     | 0         |       |
|                                           |               | 3                              | 0                     | 0         |       |
|                                           |               | 4                              | 0                     | 0         |       |
|                                           |               | 5                              | 0                     | 0         |       |
| <b>Ampullectomy:</b>                      | n (%)         | 1                              | 1 (100)               | 0         | 0.157 |
|                                           |               | 2                              | 0                     | 0         |       |
|                                           |               | 3                              | 0                     | 1 (100)   |       |
|                                           |               | 4                              | 0                     | 0         |       |
|                                           |               | 5                              | 0                     | 0         |       |

Abbreviations: SD, standard deviation

\* Given the small number of subjects and absence of variation in the data, mean scores (SD) were not calculated for the following items: Sphincterotomy, stricture dilation using balloon/catheter, single operator pancreatoscopy, biopsies, ampullectomy.

**Supplemental Table 5. Comparison adverse events between the duodenoscope types**

|                       |                    | Single-use<br>duodenoscope<br>(n=48) | Reusable<br>duodenoscope<br>(n=50) | p-value |
|-----------------------|--------------------|--------------------------------------|------------------------------------|---------|
| Adverse events: n (%) | Overall:           | 2 (4.2)                              | 4 (8.0)                            | 0.429   |
|                       | Type:              |                                      |                                    |         |
|                       | Acute pancreatitis | 1 (2.1)                              | 2 (4.0)                            |         |
|                       | Cholangitis        | 1 (2.1)*                             | 0                                  |         |
|                       | Cardiovascular     | 0                                    | 1 (2.0)†                           |         |
| Bleeding              | 0                  | 1 (2.0)                              |                                    |         |

\* This patient had cholangitis, *Escherichia coli* bacteremia and sepsis from bile duct stones and decompensated despite undergoing ERCP for bile duct stone removal and died two days post-procedure from an endogenous infection (not duodenoscope-related exogenous infection).

† This patient developed atrial fibrillation with rapid ventricular response and cardiogenic shock following ERCP and subsequently died.
